# Supplementary material for: Caspase-11-Gasdermin D-Mediated Pyroptosis Is Involved in the Pathogenesis of Atherosclerosis
Source: PubMed Central journal article supplement (PMC8109243; doi:10.3389/fphar.2021.657486), 2021-04-26

**Figure S1**

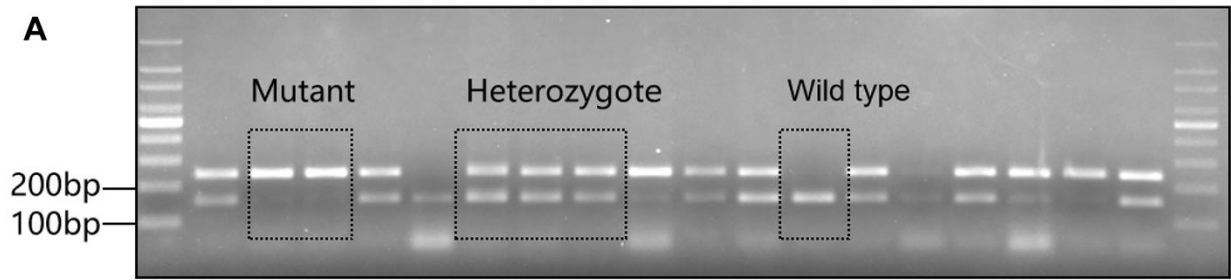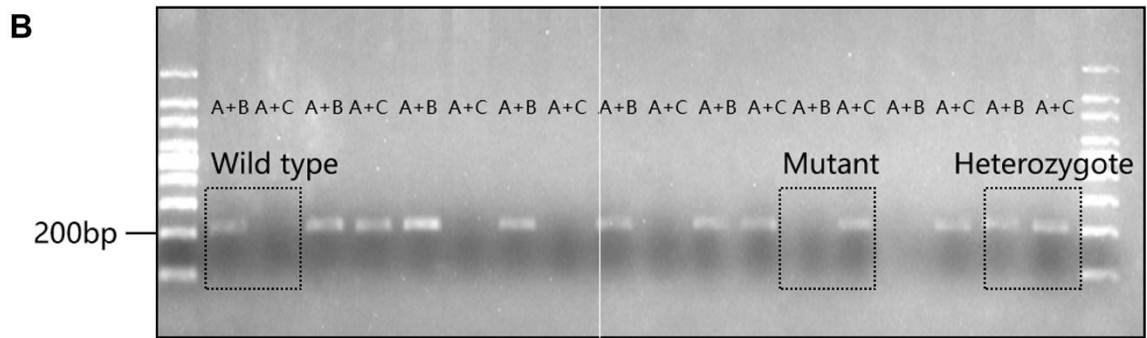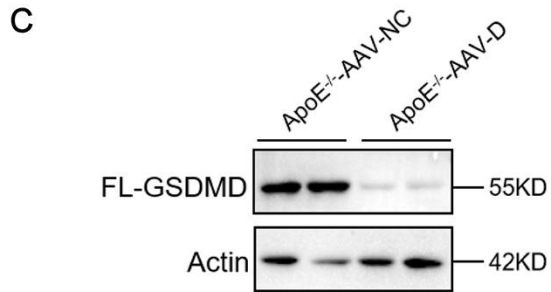

Figure S2

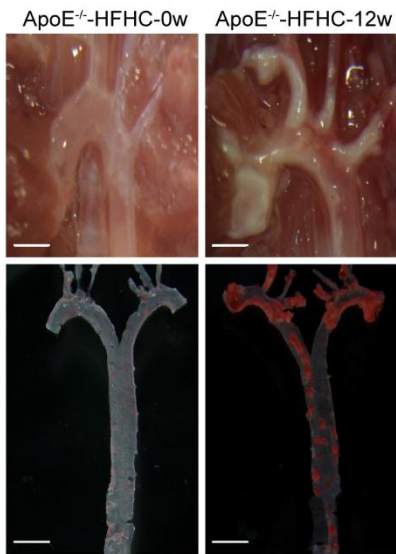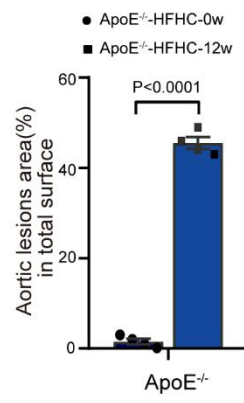

Figure S3

A

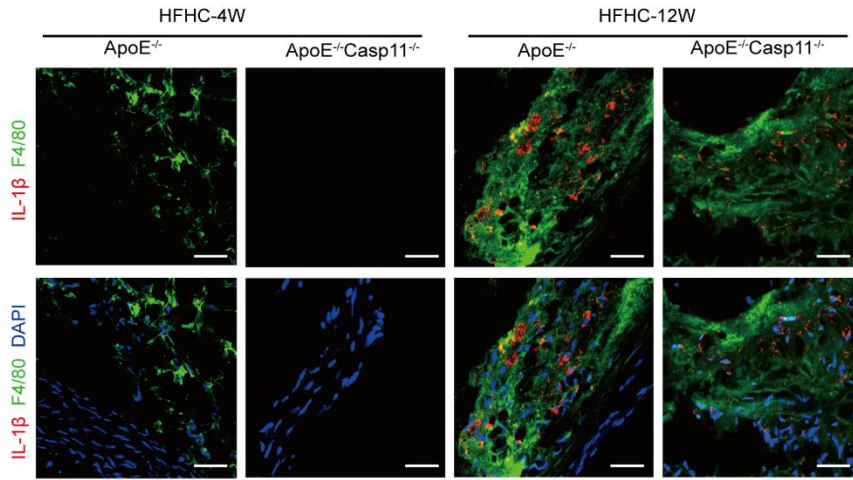

B

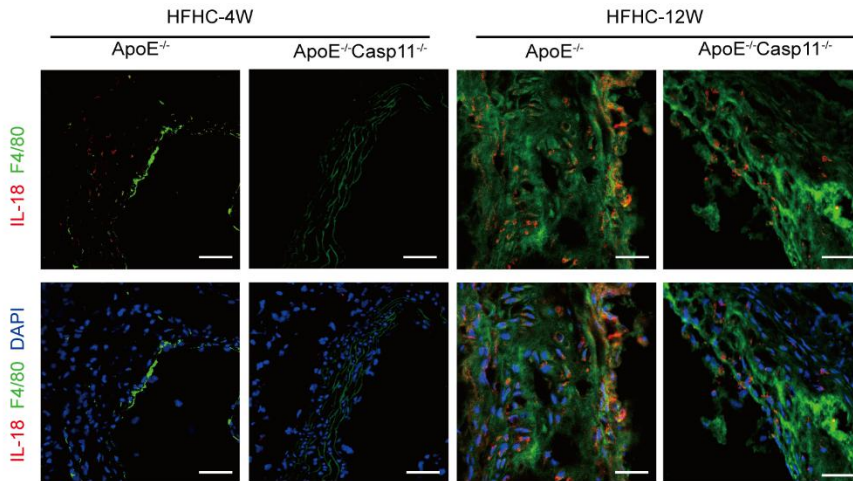

C

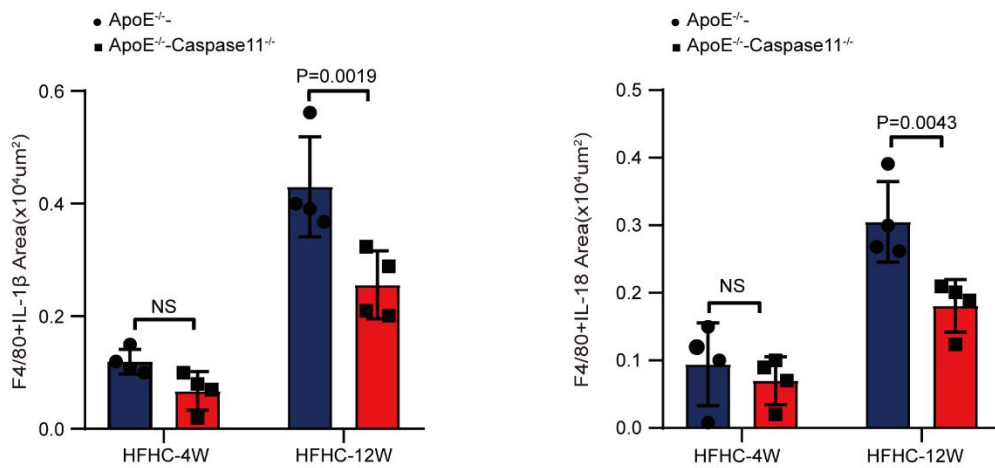

**Figure S4**

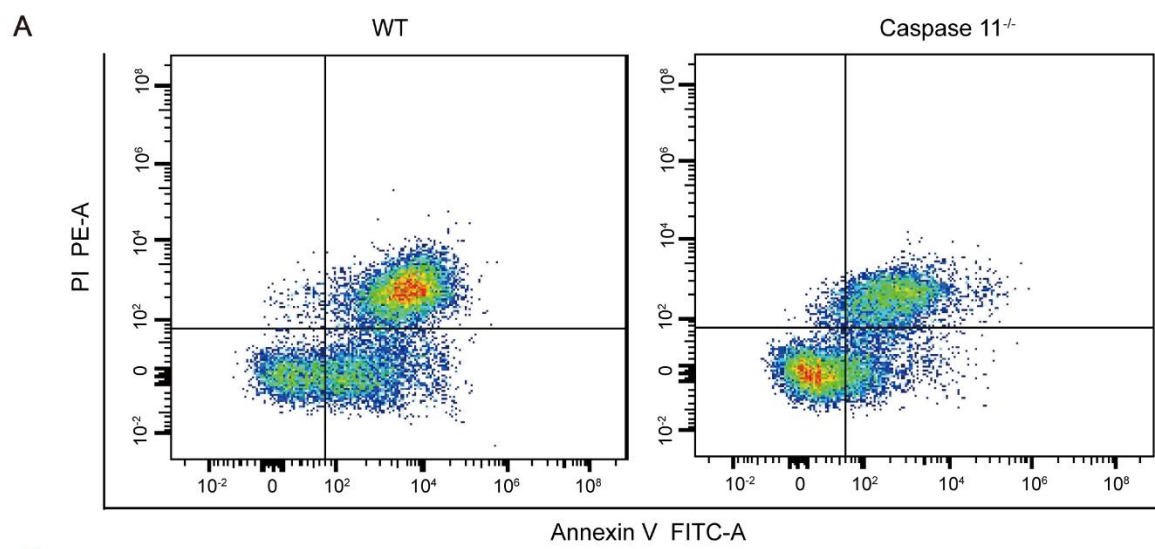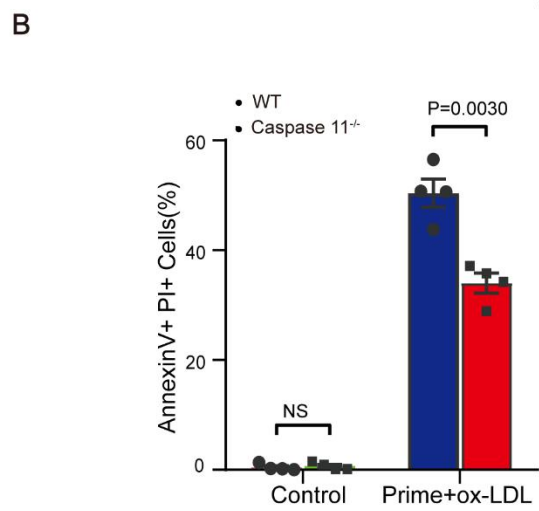

Supplement: datasheet1.pdf [file datasheet1.pdf]
